# Supplementary material for: Origin and Evolution of Rickettsial Plasmids
Source: PubMed Central journal article supplement (PMC4750851; doi:10.1371/journal.pone.0147492), 2016-02-11

**Figure A.** Correlation between pooled plasmid sizes and chromosome sizes of *Rickettsia* species. The coefficient of determination is  $R^2 = 0.76$  and the coefficient of correlation of Pearson is  $R = 0.91$ ,  $P$ -value  $< 0.05$ .

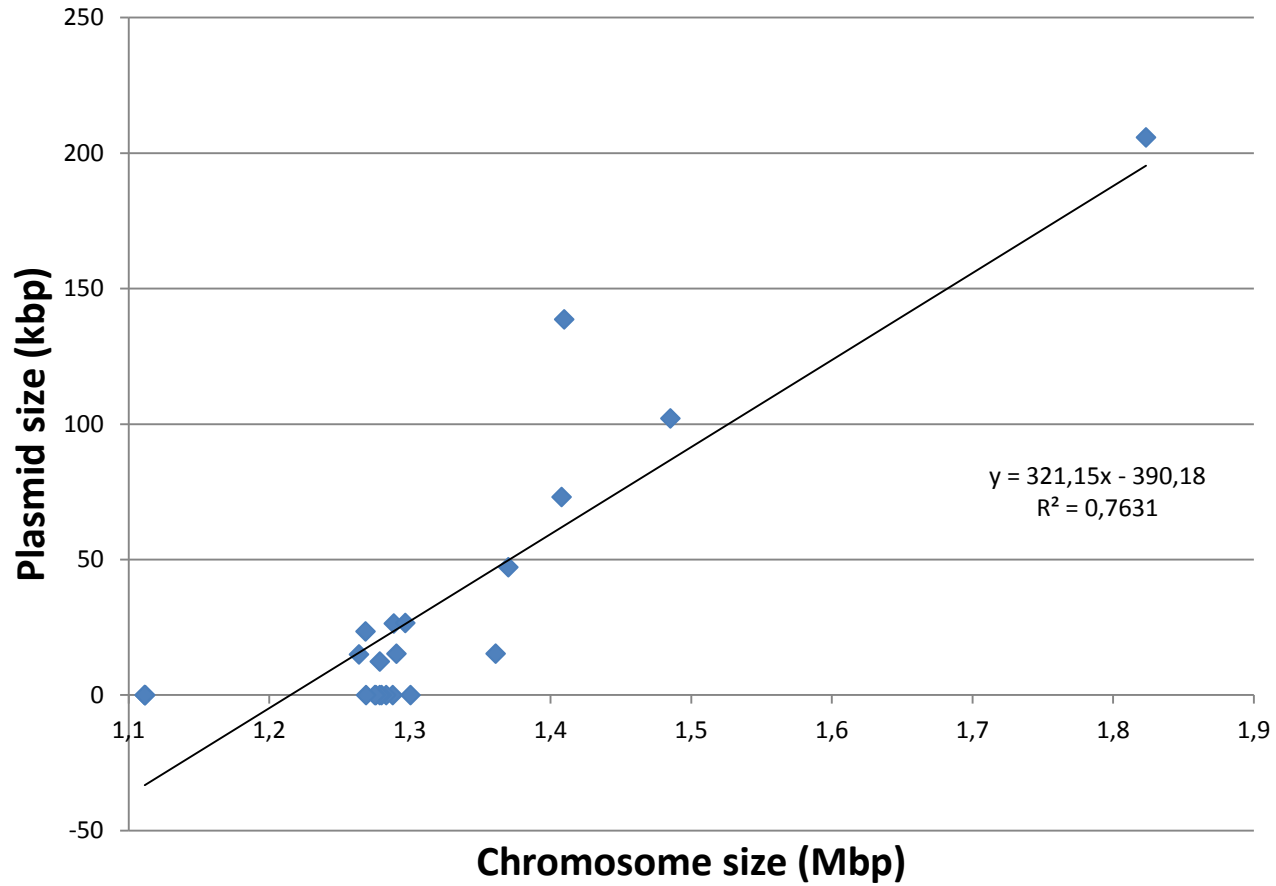

**Figure B.** Pairwise alignments of complete sequences of the four major groups I (A), II (B), III (C) and IV (D) of *Rickettsia* plasmids as well as of intra-cellular plasmid of *R. raoultii* (E), *R. endosymbionte* of *I. scapularis* (F) and *R. amblyomii* (G). The plasmid pRra2 was used as reference for all alignments. All sequences started with *dnaA*-like gene and ended with *parA* and some unknown genes.

A

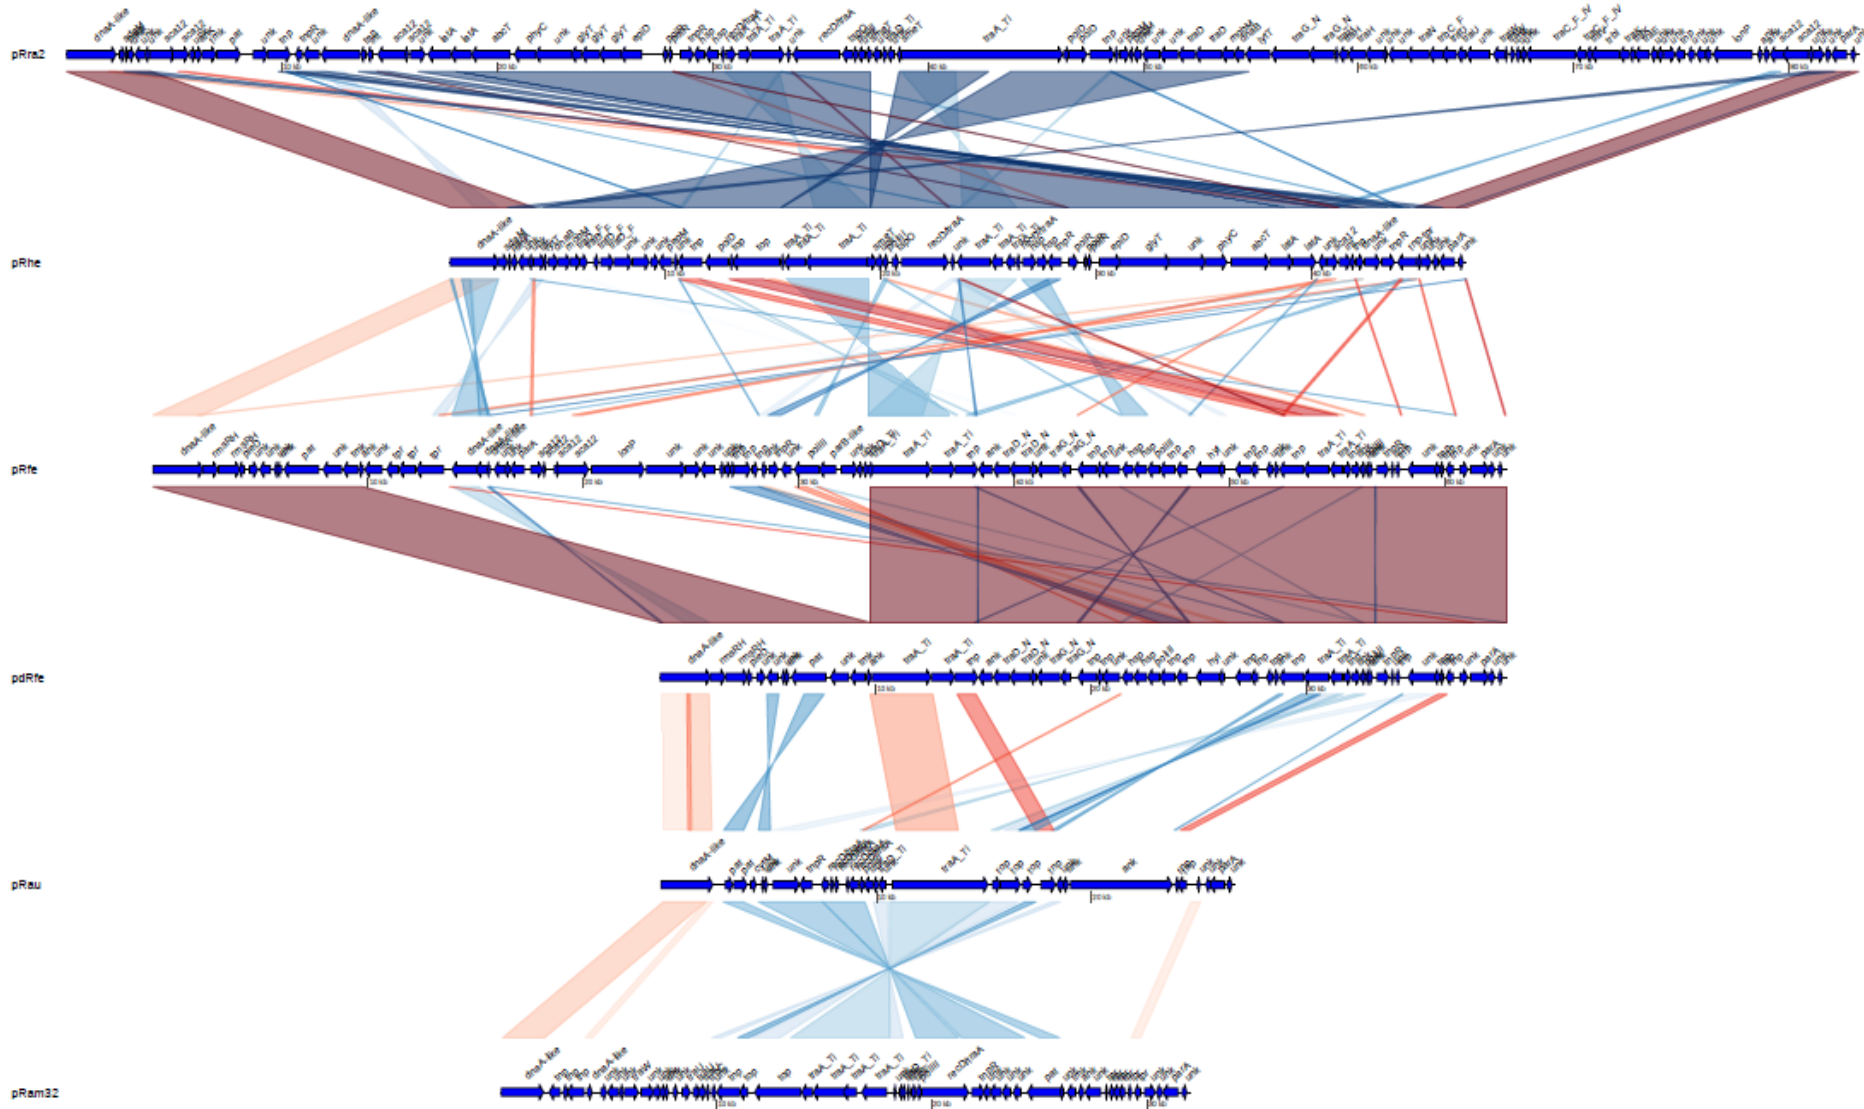

**B**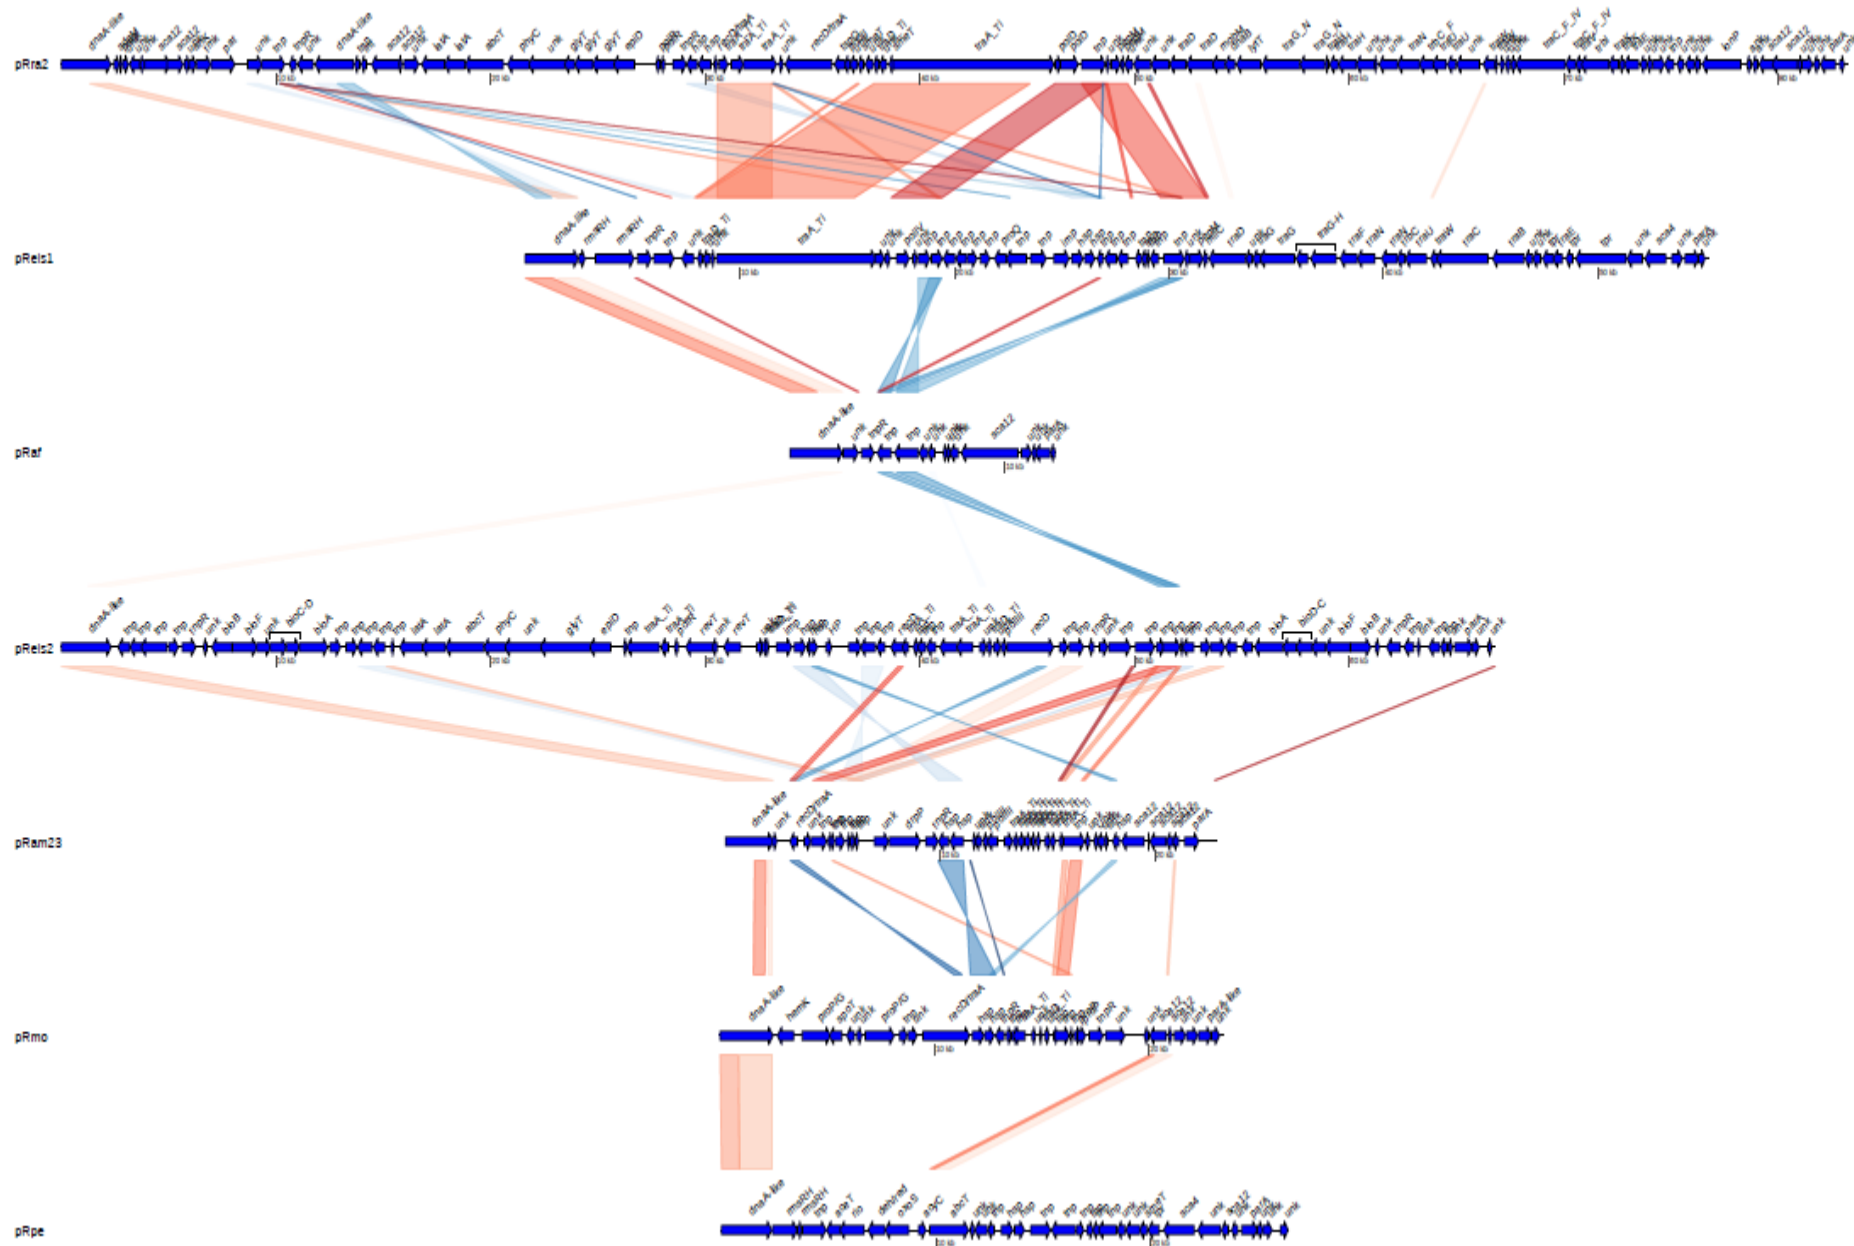

C

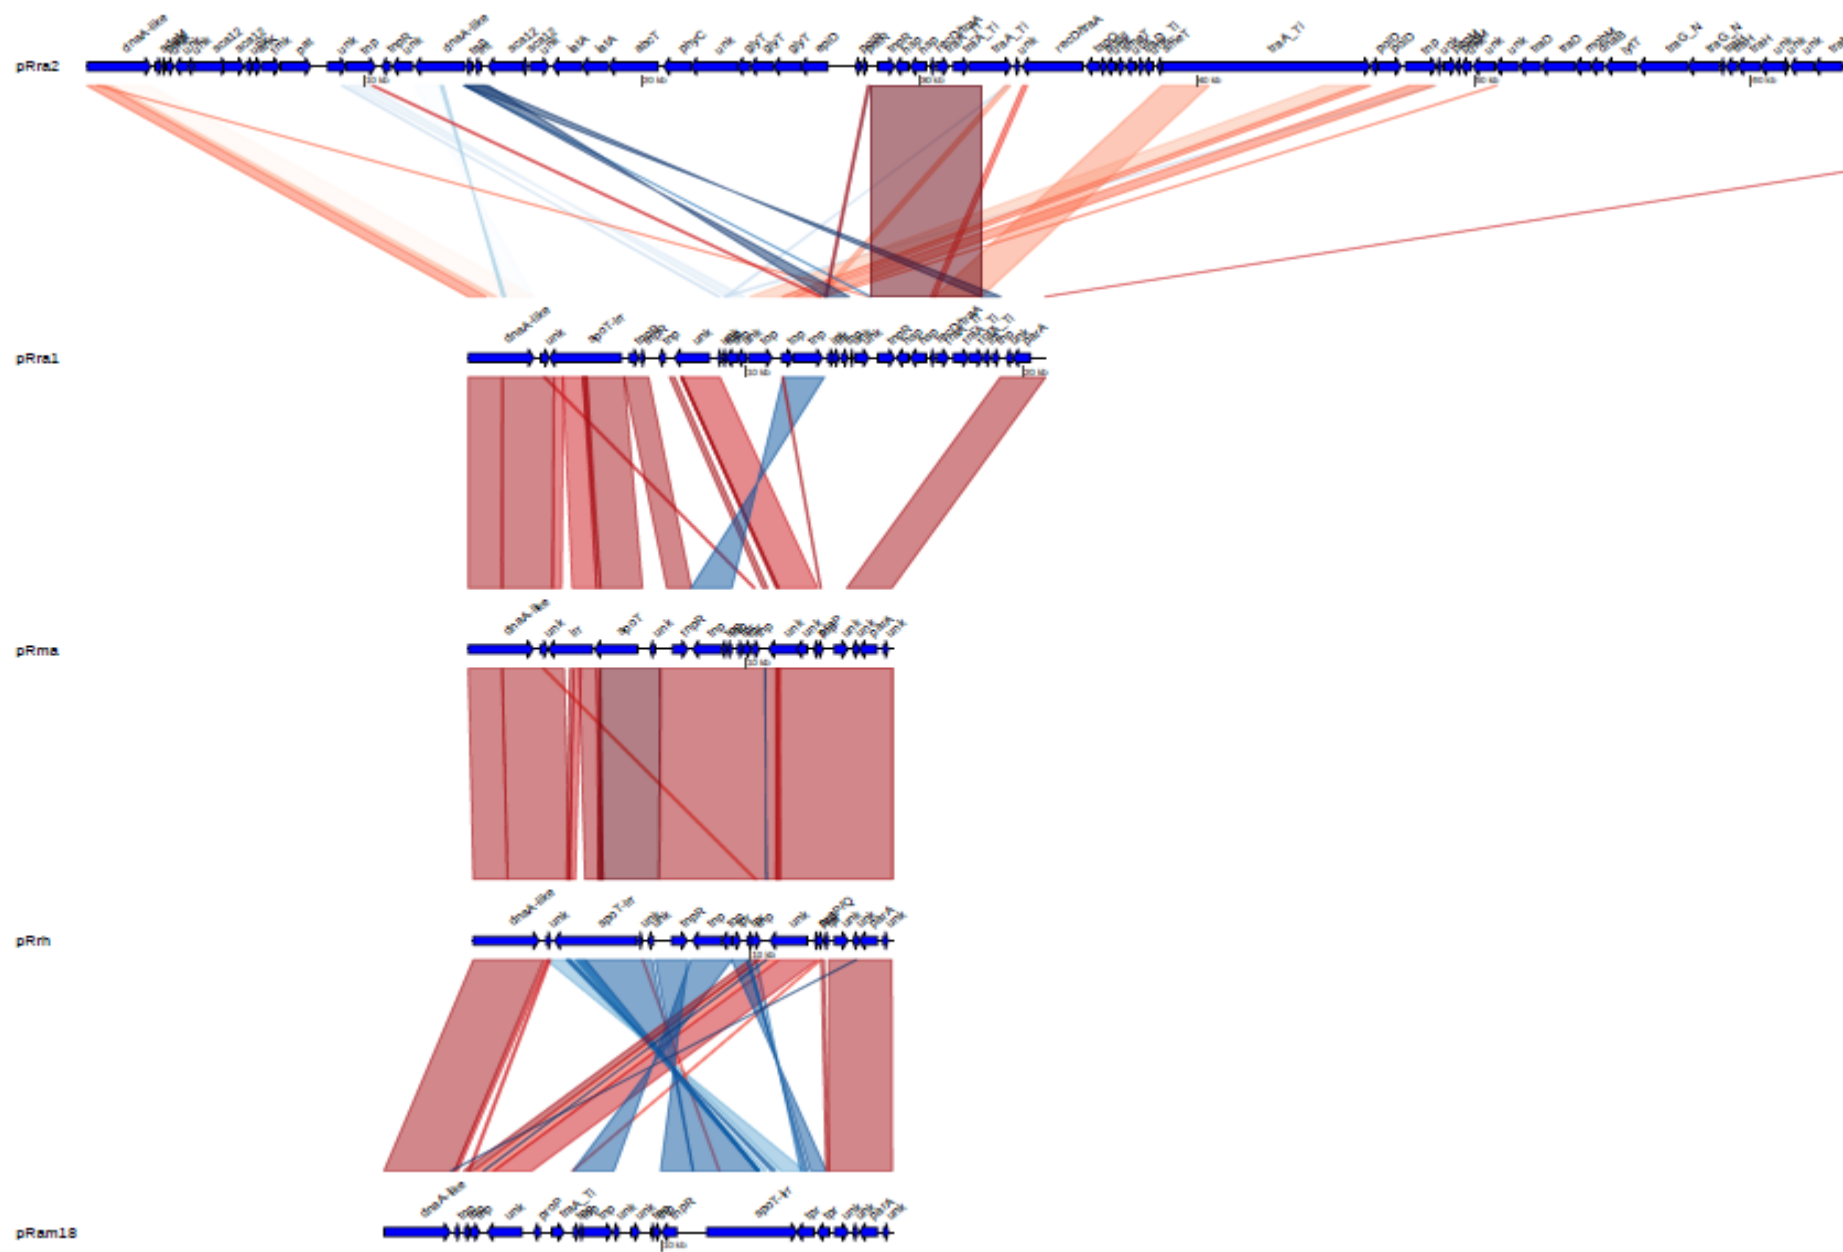

D

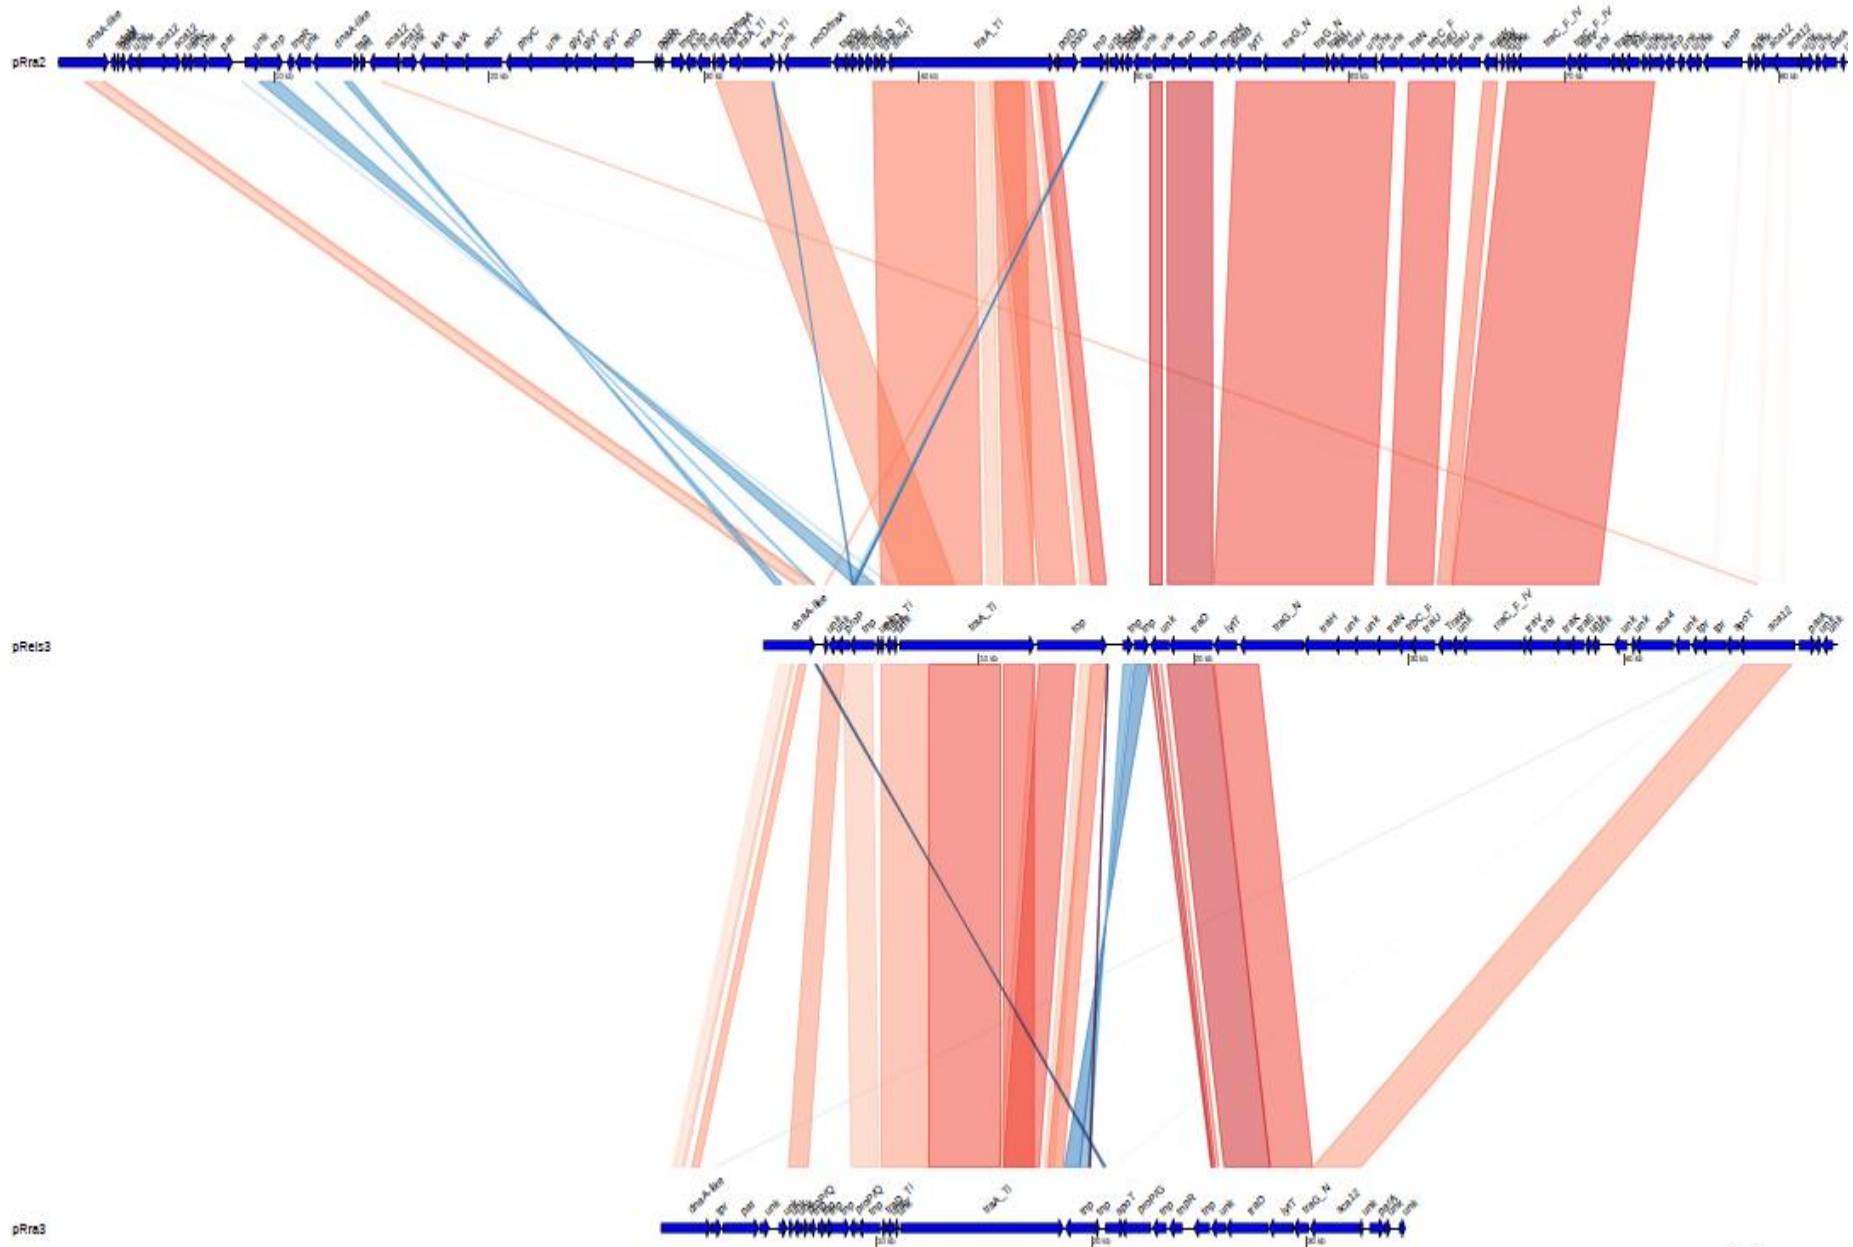

E

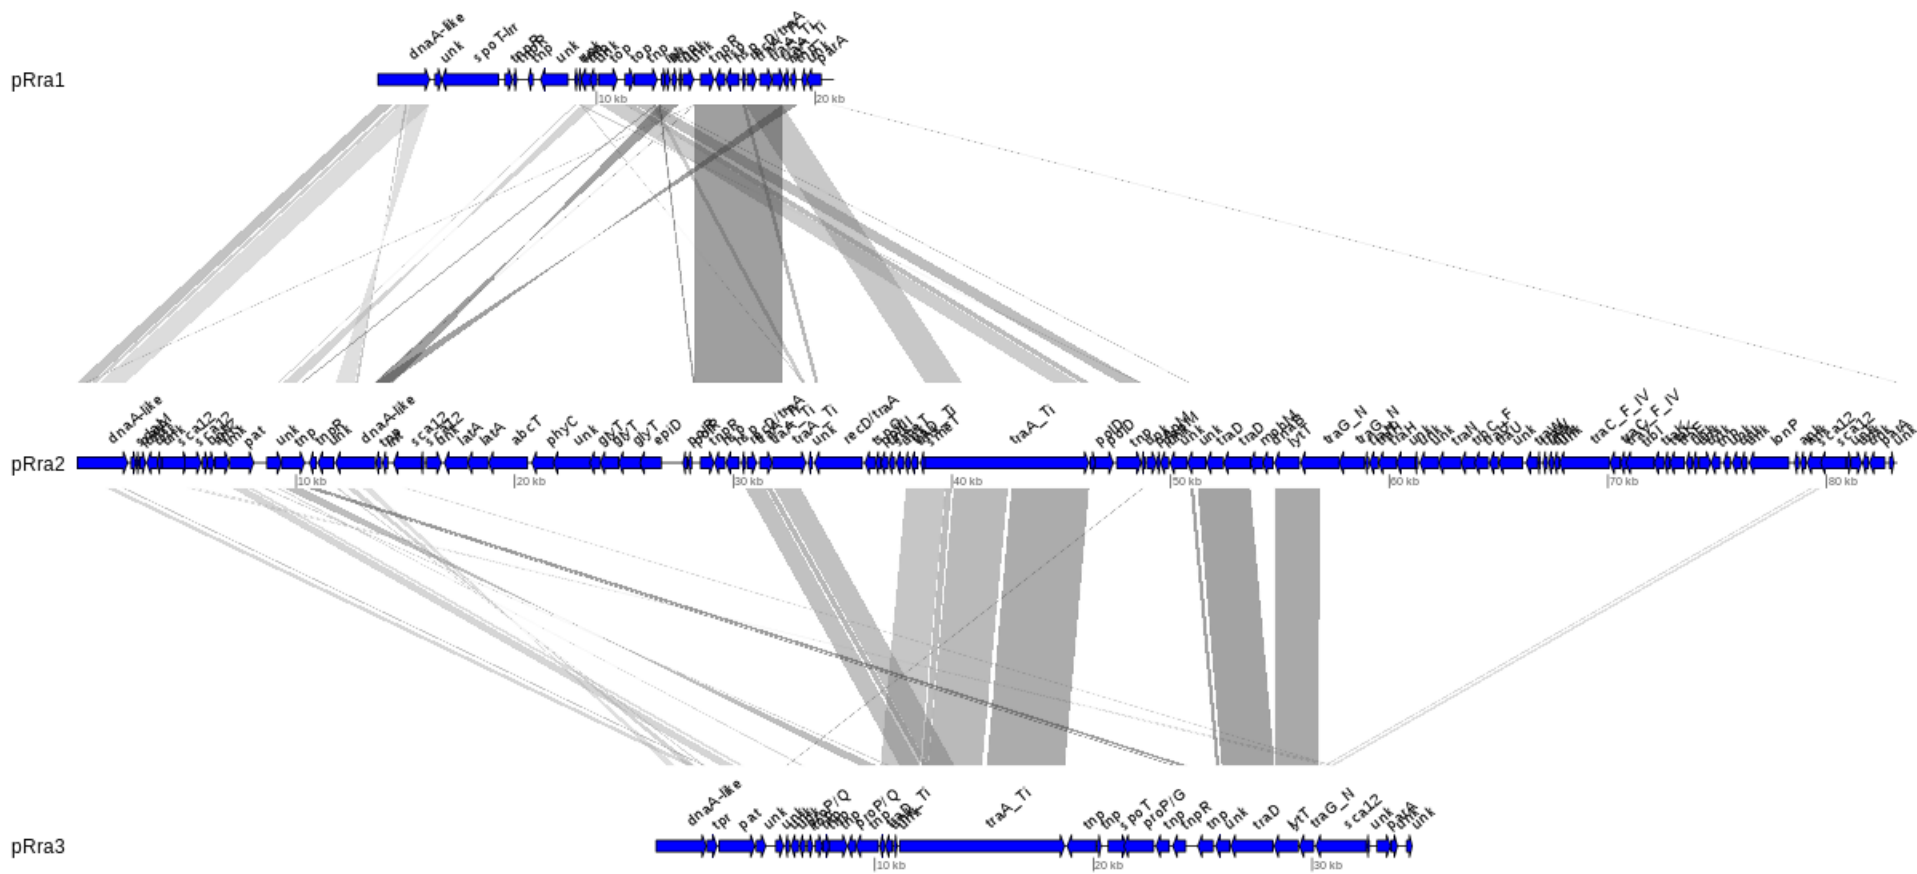

10 kb



G

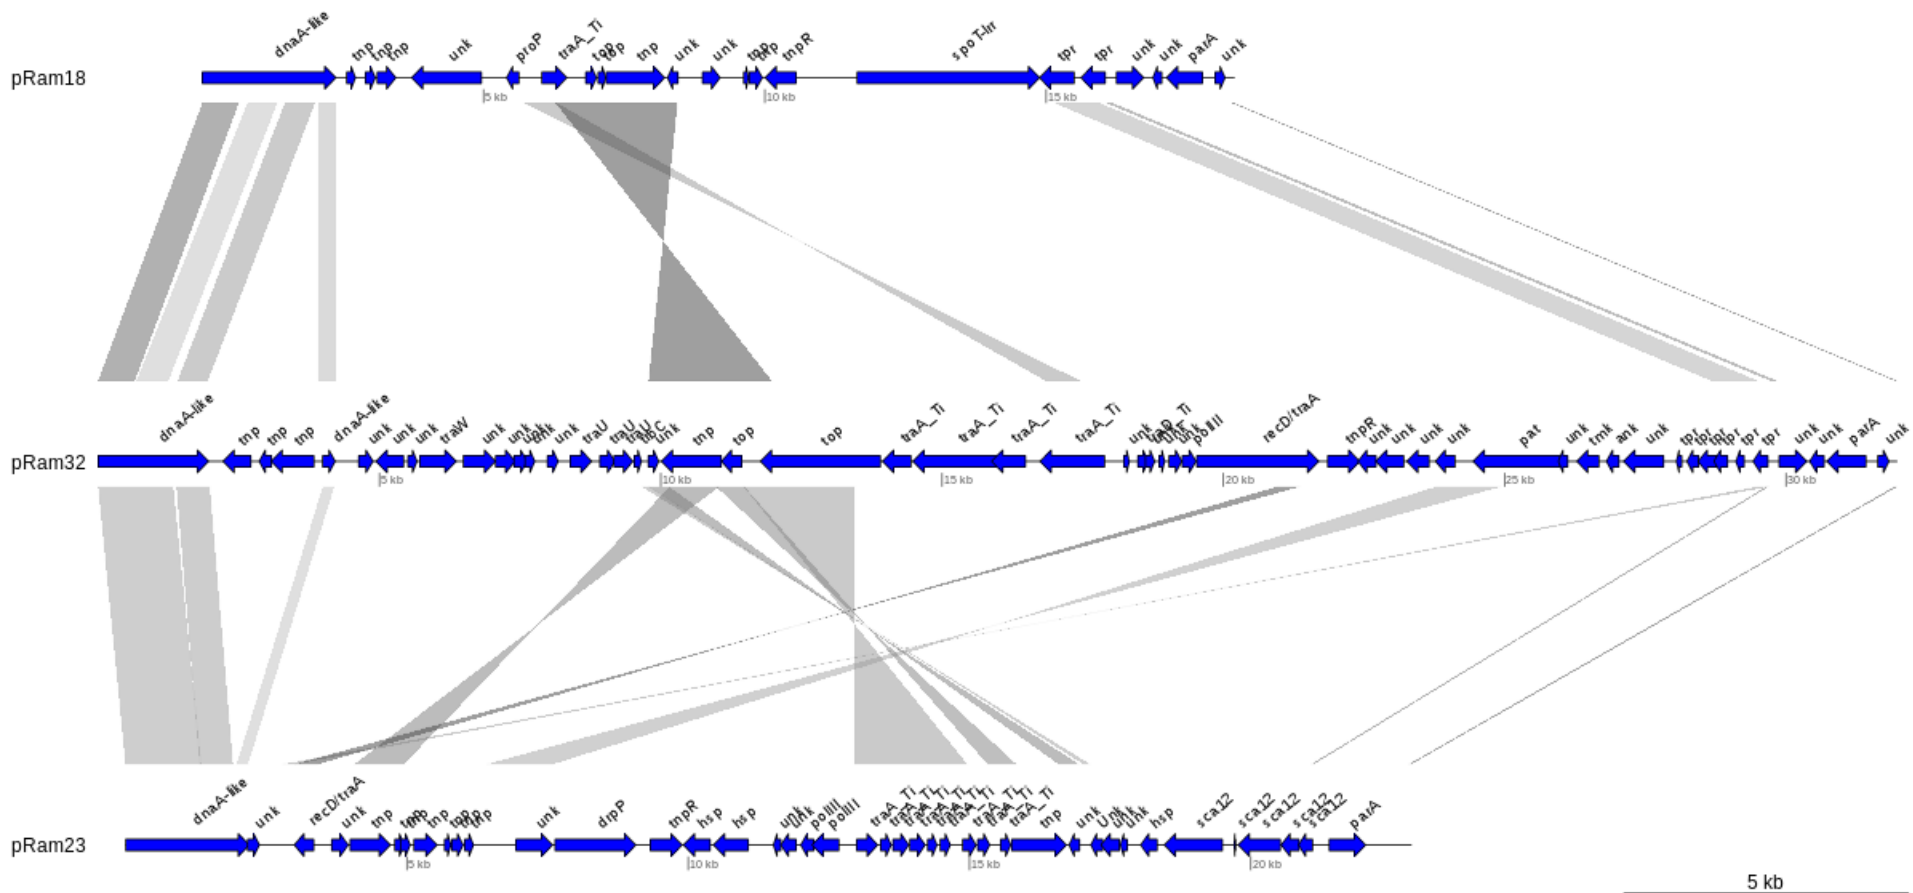



**Figure C.** Horizontal gene transfers occurred between *R. raoultii* chromosome, *R. peacockii* plasmid and *Pseudomonas aeruginosa* chromosome.

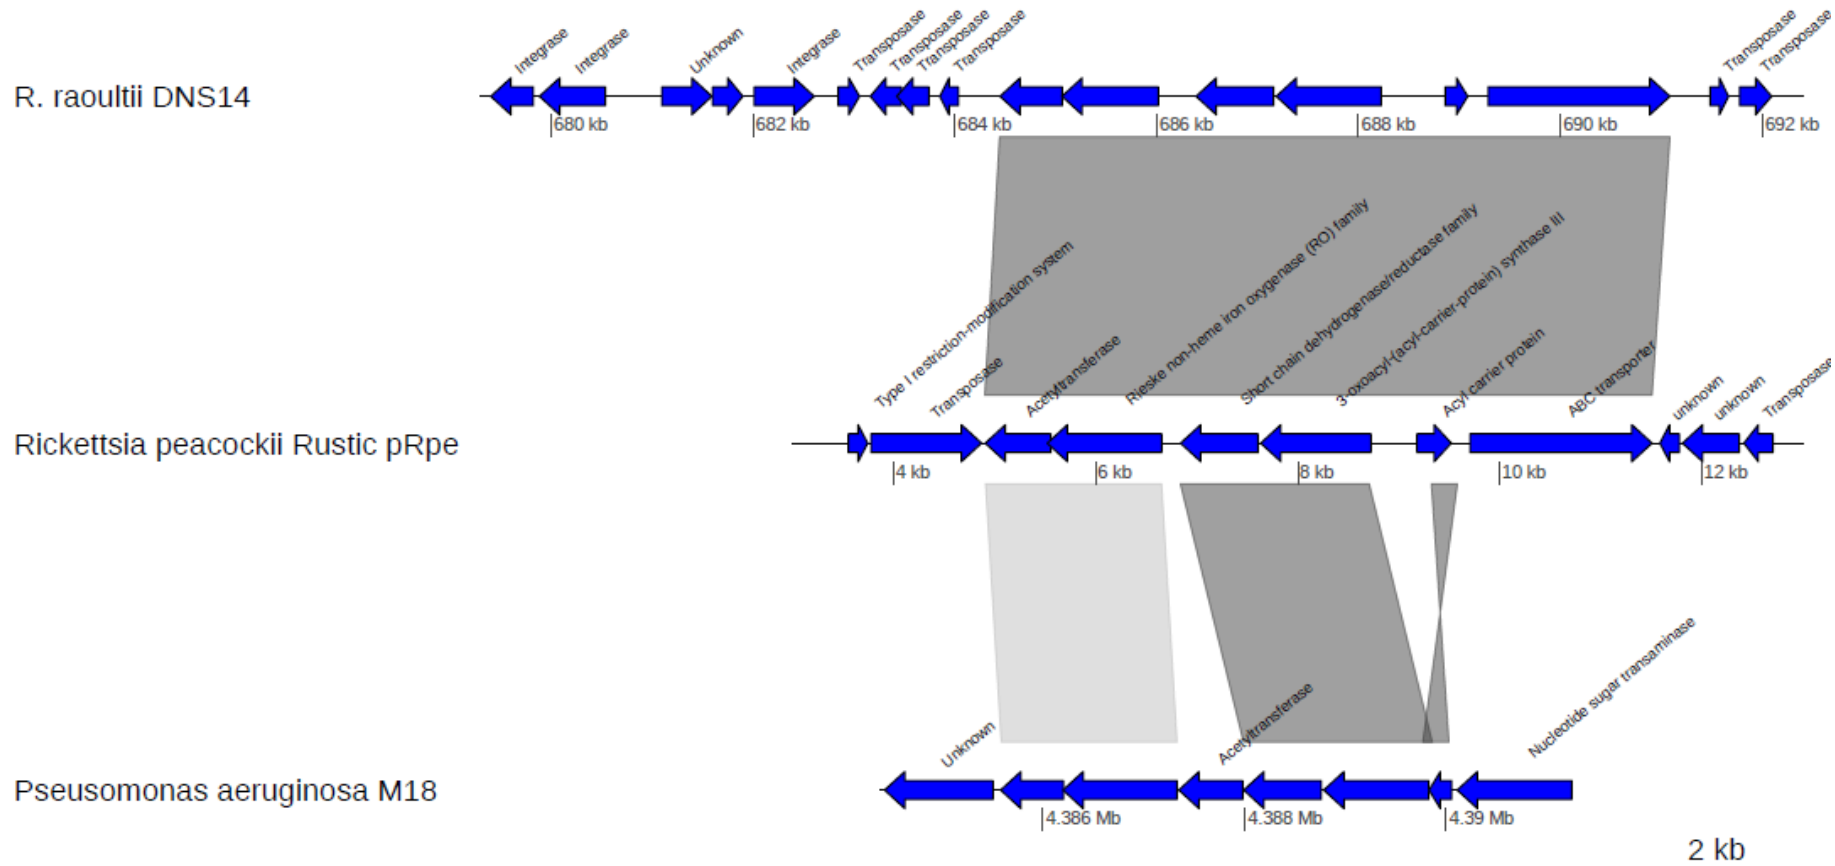

**Figure D.** Species details of evident HGT2 and 3 events occurred between rickettsial plasmids and non-*Rickettsia/Orientia* genomes, as inferred from best BLAST homology and phylogenetic relationships ( $50 \geq \text{aa identity} \leq 100$  and  $\text{BP} \geq 60$ ). Colors of species correspond to  $\alpha$ -proteobacteria (blue),  $\gamma$ -proteobacteria (yellow),  $\beta$ -proteobacteria (cyan),  $\delta$ -proteobacteria (beige), Bacteroidetes (red), Planctomycetes (green) and Other bacteria (white).

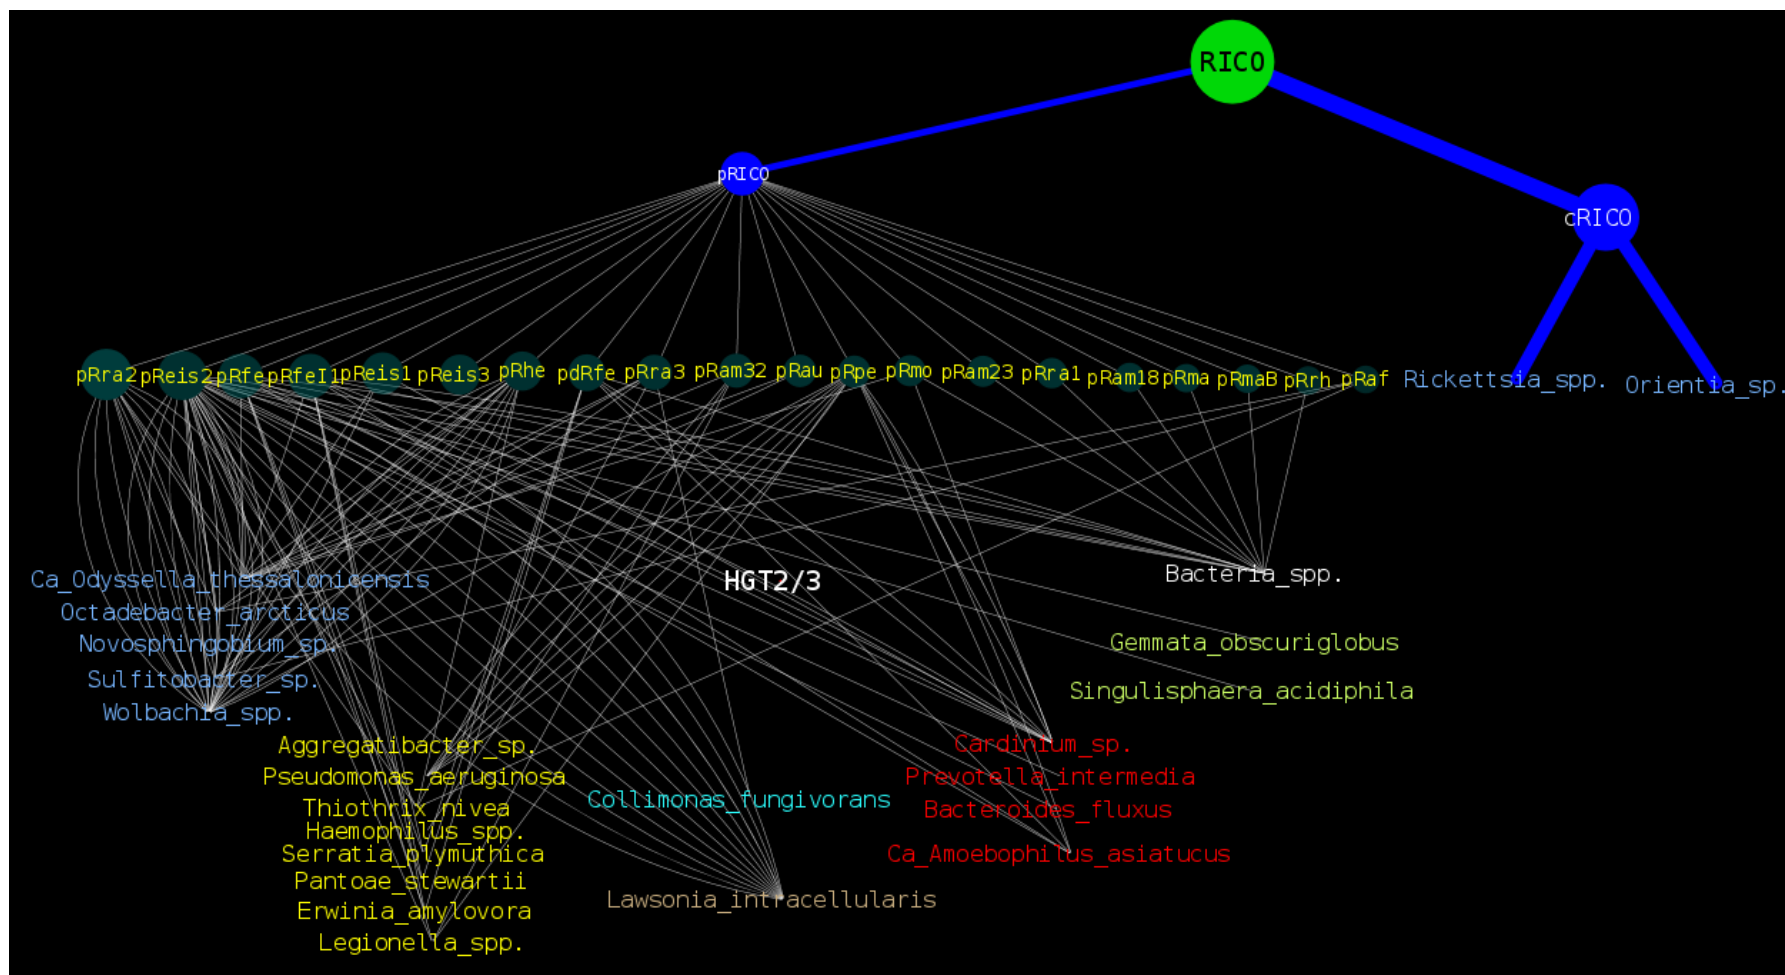

**Figure E.** Genus detail of putative HGT2 events occurred between rickettsial plasmids and unknown non-*Rickettsia/Orientia* genomes, as inferred from best BLAST homology ( $25 \geq \text{aa identity} < 80$ ). Colors of species correspond to  $\alpha$ -proteobacteria (blue),  $\gamma$ -proteobacteria (yellow),  $\beta$ -proteobacteria (cyan), Bacteroidetes (red), Deferribacteres (yellow), Cyanobacteria (silver), Chlamydiae (white), Firmicutes (grey), Spirochaetes (white), Archaea (brown) and Eukaryota (turquoise).

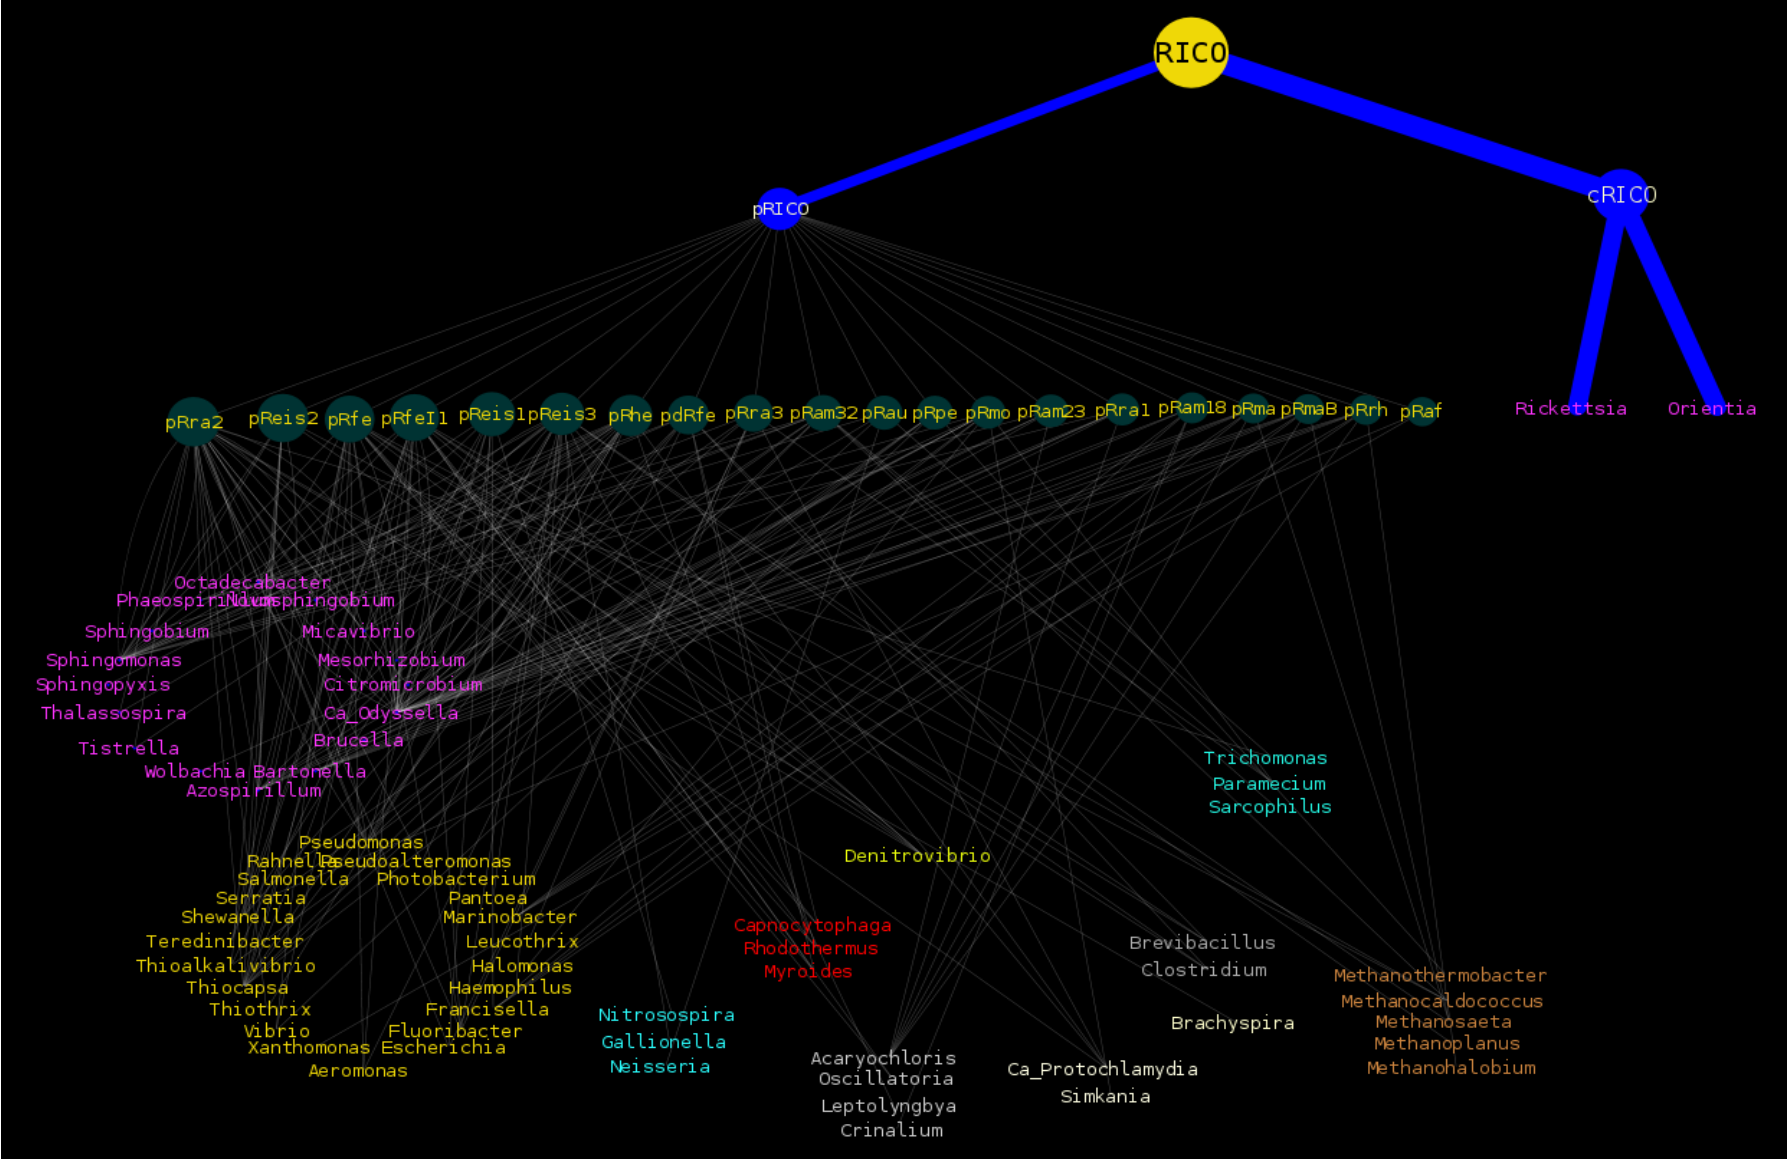

Supplement: pone.0147492.s002.pdf [file pone.0147492.s002.pdf]
