# Supplementary material for: Origin and Evolution of Rickettsial Plasmids
Source: PubMed Central journal article supplement (PMC4750851; doi:10.1371/journal.pone.0147492), 2016-02-11
Supplement: pone.0147492.s001.pdf [file pone.0147492.s001.pdf]

**Table A.** General features of circular sequenced plasmids of the genus *Rickettsia*.

| <b>Species &amp; strain</b>   | <b>Name</b> | <b>Size</b> | <b>Genes</b> | <b>Coding (%)</b> | <b>GC (%)</b> |
|-------------------------------|-------------|-------------|--------------|-------------------|---------------|
| <i>R. africae</i> ESF-5       | pRaf        | 12,377      | 15           | 88                | 34            |
| <i>R. massiliae</i> MTU5      | pRma        | 15,286      | 16           | 78                | 32            |
| <i>R. massiliae</i> AZT80     | pRmaB       | 15,000      | 16           | 81                | 32            |
| <i>R. peacockii</i> Rustic    | pRpe        | 26,406      | 29           | 87                | 35            |
| <i>R. monacensis</i> IrR      | pRmo        | 23,486      | 29           | 82                | 32            |
| <i>R. helvetica</i> C9P9      | pRhe        | 47,188      | 50           | 90                | 33            |
| <i>R. felis</i> URRWXCAl2     | pRfe        | 62,829      | 68           | 86                | 34            |
|                               | pDRfe       | 39,263      | 44           | 86                | 33            |
| <i>R. felis</i> I1            | pRfeI1      | 62,882      | 70           | 86                | 34            |
| <i>C. R. amblyomii</i> AaR/SC | pRam18      | 18,344      | 17           | 75                | 32            |
|                               | pRam23      | 22,852      | 21           | 75                | 33            |
|                               | pRam32      | 31,972      | 36           | 84                | 34            |
| <i>R. endosymbiont</i> REIS   | pReis1      | 55,147      | 52           | 87                | 34            |
|                               | pReis2      | 66,811      | 67           | 83                | 32            |
|                               | pReis3      | 49,883      | 42           | 92                | 35            |
| <i>R. raoultii</i> DNS14      | pRra1       | 20,840      | 22           | 81                | 32            |
|                               | pRra2       | 83,219      | 85           | 92                | 34            |
|                               | pRra3       | 34,583      | 31           | 90                | 34            |
| <i>R. australis</i>           | pRau        | 26,610      | 20           | 82                | 34            |
| <i>R. rhipicephalii</i>       | pRrh        | 15,099      | 17           | 80                | 32            |

\* pReis4 plasmid has a size of 33,951 bp as an incomplete linear contig available in GenBank database.

**Table B.** Comparative COG functional categories of vertical and horizontal gene transfers (VGT and HGT, resp.) as well as duplicated genes between rickettsial plasmids and *Rickettsia/Orientia* as well as non-*Rickettsia/Orientia* genomes.

| <b>Genes from VGT* and duplicated VGT**</b>                                         | <b>Genes from HGT1†, HGT2* and duplicated HGT2**</b>               |
|-------------------------------------------------------------------------------------|--------------------------------------------------------------------|
| <b>Information storage and processing [L, K and J]</b>                              |                                                                    |
| <b>Replication, recombination and repair</b>                                        | <b>Replication, recombination and repair</b>                       |
| 2 <i>dnaA</i> -like replication initiator protein*                                  | 15 transposases and/or integrases†                                 |
| 6 transposases and/or integrases*                                                   | 1 RNA-directed DNA polymerase†                                     |
| 2 helicases <i>recD/traA</i> *                                                      | 1 Deoxyribodipyrimidine photo-lyase†                               |
| 2 conjugative transfer relaxase <i>traA</i> _Ti chimeric or not with topoisomerase* | 10 transposases and/or integrases*                                 |
| 1 DNA polymerase III, epsilon subunit *                                             | 5 resolvases*                                                      |
| 1 DNA adenine methylase domain protein*                                             | 2 RNA-directed DNA polymerase *                                    |
| 14 transposases and/or integrases**                                                 | 1 DNA-directed DNA polymerase*                                     |
| 1 helicases <i>recD/traA</i> **                                                     | 1 Cytosine-specific methyltransferase*                             |
|                                                                                     | 1 resolvase**                                                      |
| <b>Transcription</b>                                                                | <b>Transcription</b>                                               |
| 2 Helix-turn-helix DNA-binding domain*                                              | 1 Putative DNA-binding protein*                                    |
| 1 Helix-turn-helix DNA-binding domain**                                             | 1 ParB-like nuclease domain-containing protein*                    |
| <b>Translation</b>                                                                  | <b>Translation</b>                                                 |
|                                                                                     | 1 HemK†                                                            |
| <b>Cellular processes and signaling [O, U, M, D, V and T]</b>                       |                                                                    |
| <b>Intracellular trafficking and secretion</b>                                      | <b>Intracellular trafficking and secretion</b>                     |
| 12 conjugative transfer/coupling proteins Tra, Trb and Trw*                         | 11 conjugative transfer/coupling proteins Tra, Trb and Trw*        |
| 1 conjugative transfer protein containing TraD domain**                             |                                                                    |
| <b>Postranslational modification, protein turnover, chaperones</b>                  | <b>Postranslational modification, protein turnover, chaperones</b> |
| 2 small heat shock proteins Hsps*                                                   | 1 lon ATP-dependent protease with TPR domain*                      |
| 1 small heat shock proteins Hsps**                                                  | 1 lon ATP-dependent protease with TPR domain**                     |
| <b>Cell wall/membrane and biosynthesis</b>                                          | <b>Cell wall/membrane and biosynthesis</b>                         |
|                                                                                     | 1 Putative lytic transglycosylase (LT) domain protein*             |

### Cell cycle control

### Defense mechanisms

1 Type I restriction-modification system methyltransferase subunit\*

### Transductions mechanisms

1 Guanosine polyphosphate pyrophosphohydrolase/synthetase SpoT22\*  
2 ProP/Q activator of osmoprotectant transporter\*  
1 Tryptophan-rich sensory protein, TspO\_MBR superfamily\*  
1 Transcriptional regulator, luxR family\*  
1 Response regulation protein PleD\*

## Metabolism [E, F, G, I, P, H and Q]

### Nucleotide transport and metabolism

1 Thymidylate kinase\*

### Carbohydrate transport and metabolism

2 Major facilitator superfamily MFS-type transporter\*

### Amino acid transport and metabolism

### Lipid transport and metabolism

1 Conserved protein of unknown function\*  
1 NAD-dependent epimerase/dehydratase family protein\*  
1 Glycosyltransferase, group 1 family protein\*

### Cell cycle control

3 Plasmid partitioning ParA family protein\*  
1 Plasmid partitioning ParA-like family protein\*  
1 Mobile mystery protein B\*  
1 Plasmid partitioning ParA-like family protein\*\*

### Defense mechanisms

1 Type I restriction-modification system methyltransferase subunit\*  
1 ABC multidrug transporter, permease/ATP-binding protein\*

### Transductions mechanisms

1 Guanosine polyphosphate pyrophosphohydrolase/ synthetase SpoT23†

### Nucleotide transport and metabolism

### Carbohydrate transport and metabolism

### Amino acid transport and metabolism

2 L-allo-threonine aldolase\*

### Lipid transport and metabolism

1 Short chain dehydrogenase/reductase family protein\*  
1 3-oxoacyl-(acyl-carrier-protein) synthase III\*  
1 Acyl carrier protein\*

### Coenzyme, transport and metabolism

### Secondary metabolites biosynthesis, transport and catabolism

### Inorganic ion transport and metabolism

1 SMR-type multi-drug efflux transporter\*

### Poorly- and uncharacterized

1 Cell surface antigen Sca12\*  
1 Cell surface antigen Sca4\*  
1 Patatin-like phospholipase\*  
2 WGR domain-containing protein\*  
1 Peptidase family M50\*  
1 Integral membrane protein\*  
15 Conserved protein of unknown function\*

2 Cell surface antigen Sca12\*\*

1 Conserved protein of unknown function\*\*

### Coenzyme, transport and metabolism

1 Transaminase BioA\*  
1 Dethiobiotin synthase BioD\*  
1 Synthetase and related enzymes BioF\*  
1 Biotin synthase BioB\*  
1 Transaminase BioA\*\*  
1 Dethiobiotin synthase BioD\*\*  
1 Synthetase and related enzymes BioF\*\*  
1 Biotin synthase BioB\*\*

### Secondary metabolites biosynthesis, transport and catabolism

1 Biotin biosynthesis protein BioC, S-adenosylmethionine-dependent methyltransferases family protein\*  
1 Phytanoyl-CoA dioxygenase family protein\*  
1 Biotin biosynthesis protein BioC, S-adenosylmethionine-dependent methyltransferases family protein\*\*

### Inorganic ion transport and metabolism

1 Rieske non-heme iron oxygenase (RO) family protein\*

6 Conserved protein of unknown function†

8 Tetratricopeptide repeat-containing protein\*

5 Ankyrin repeat-containing protein\*

1 alpha/beta hydrolase family protein\*

1 Hyaluronidase\*

17 Conserved protein of unknown function\*

1 alpha/beta hydrolase family protein\*\*
